# Supplementary material for: Electrochemical deposition and pseudocapacitive behavior in urea-based quasi-ionic liquid electrolytes studied with X-ray absorption spectra
Source: Royal Society of Chemistry journal article supplement (doi:10.1039/c2ra21379f), 2012-01-01
Supplement: c2ra21379f.pdf [file c2ra21379f.pdf]

# Electrochemical deposition and pseudocapacitive behavior in urea-based quasi-ionic liquid electrolytes studied with X-ray absorption spectra

Ming-Jay Deng<sup>a\*</sup>, Jin-Ming Chen<sup>a\*</sup>, Kueih-Tzu Lu<sup>a\*</sup>, Cheng-Chia Wang<sup>b</sup>, Jyh-Fu Lee<sup>a</sup>, Jeng-Kuei Chang<sup>c</sup>

<sup>a</sup>National Synchrotron Radiation Research Center (NSRRC), Hsinchu, Taiwan

<sup>b</sup>Department of Applied Science, National Hsinchu University of Education, Hsinchu, Taiwan

<sup>c</sup>Institute of Materials Science and Engineering, National Central University, Taoyuan, Taiwan

## Synthesis and characterization of materials

Urea-LiPF<sub>6</sub> (molar ratio 3.6) and urea-LiTFSI (molar ratio 3.2) quasi-ILs were prepared from LiPF<sub>6</sub> (99+%, Acros), LiTFSI (98+%, Acros) and urea (98+%, Acros), which were dried in vacuum at 110 °C, 110 °C and 60 °C for 12 h, respectively.<sup>1-5</sup> The BMP-TFSI IL was prepared and purified by the procedures in the literature;<sup>6</sup> however, chlorobutane instead of iodobutane was employed in this study. For these ILs, the water content in the electrolyte was determined (Karl-Fischer titrator) to be less than 80 ppm. All electrochemical experiments were performed in an argon-purified glove box (MBraun, UNI LAB-B). Anhydrous metal chlorides, including SnCl<sub>2</sub> (99+%, Aldrich), RuCl<sub>3</sub> (99+%, Acros), NiCl<sub>2</sub> (99.9%, Aldrich), CoCl<sub>2</sub> (99.7%, Alfa Aesar), MnCl<sub>2</sub> (99.99%, Aldrich), and VCl<sub>3</sub> (99+%, Alfa Aesar) were used as received.

All electrochemical experiments were performed in a three-electrode cell regulated with a potentiostat (Autolab). A Pt wire (Alfa Aesar, 99.95%) immersed in ferrocene/ferrocenium (Fc/Fc<sup>+</sup> = 50/50 mol %) BMP-TFSI (N-butyl-N-methyl pyrrolidinium TFSI) solution contained in a glass tube with a porous Vycor tip (Bioanalytical Systems, MF-2042) served as a reference electrode.<sup>6, 7</sup>

The density, viscosity and conductivity of quasi-ILs were measured at 301 K according to procedures described.<sup>6, 7</sup> The surface morphology of the samples was probed with a scanning electron microscope (SEM, JEOL 7000F). With an ultramicrotome we prepared a Mn oxide section (thickness 40-60nm) for analysis with the transmission electron microscope (TEM, JEOL 2000F). The X-ray absorption measurements were conducted at BL07A and BL17C beamlines of the National Synchrotron Radiation Research Center (NSRRC) in Taiwan. A sealed spectro-electrochemical cell with a window (Kapton tape) transparent to fluorescence served for X-ray absorption measurements.

Natural graphite powder (particle size ~70  $\mu\text{m}$ , purity 99.99%; Alfa Aesar) was oxidized according to a modified Staudenmaier method to produce graphite oxide (GO).<sup>8</sup> Graphite (5 g) was continuously stirred in a mixed solution of sulfuric acid (88 mL), nitric acid (45 mL) and potassium chlorate (55 g) for approximately 100 h. The resulting GO was rinsed with HCl aqueous solution (5 %) and washed repeatedly with deionized water until the pH of the filtrate was neutral. The product was dried and pulverized. The GO was rapidly heated (~30  $^{\circ}\text{C}/\text{min}$ ) to 1050  $^{\circ}\text{C}$  in an inert atmosphere (Ar) and cooled in the furnace. After thermal exfoliation and reduction, graphene was produced.

Electrodes of  $\text{MnO}_2$ /graphene nanocomposite (MGN) were synthesized with ethanol-assisted graphene-sacrifice reduction.<sup>9, 10</sup>  $\text{KMnO}_4$  served as the precursor, which was reduced with graphene and ethanol to form  $\text{MnO}_2$ . In one pot,  $\text{KMnO}_4$  (0.1 M) was dissolved in KOH aqueous solution (0.2 M, 20 mL). In another pot, graphene was dispersed (with ultrasonication) in a mixture of ethanol and water (20 mL/10 mL). After combination of the two pots, vigorous stirring for 3 h ensured the complete reduction. The resulting precipitates were separated in a centrifuge followed by thorough washing with deionized water. All samples were dried overnight at 80  $^{\circ}\text{C}$

before analyses. Using the proposed ethanol-assisted graphene-sacrifice concept, we synthesized composites of  $\text{MnO}_2$  and graphene (mass ratio 9/1, evaluated with TGA).

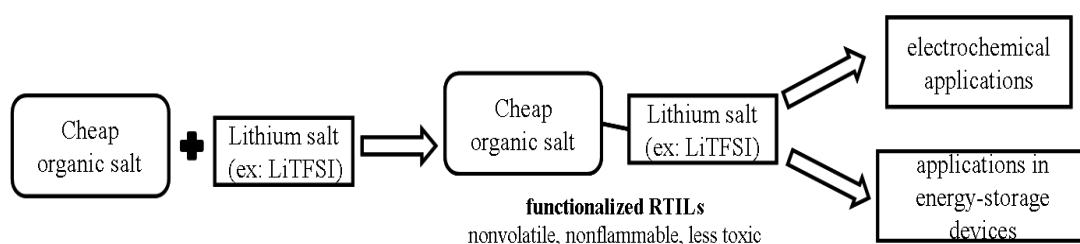

**Fig. SI1†.** Schematic illustration of the functionalized ILs attached to energy-storage devices and electrochemical applications.

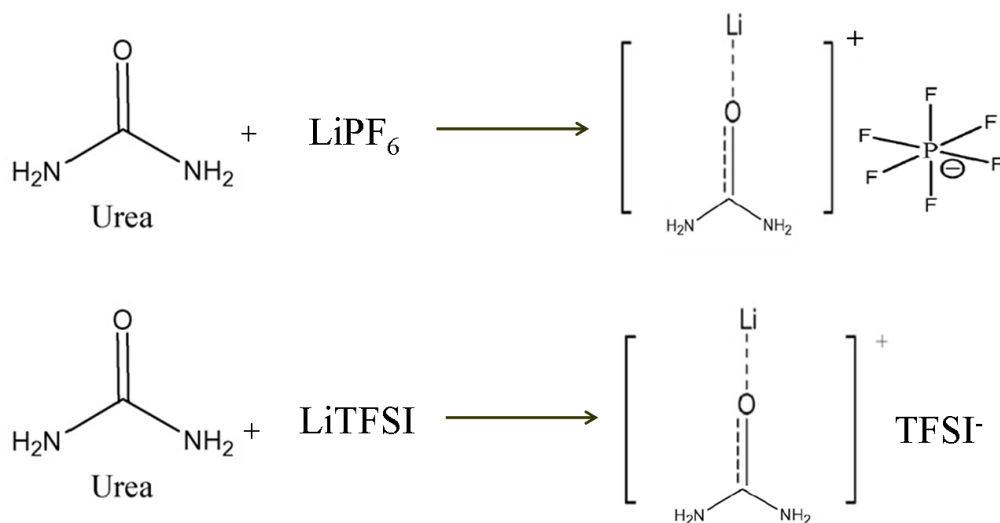

**Fig. SI2†.** The structure of urea- $\text{LiPF}_6$  and urea- $\text{LiTFSI}$ , respectively.<sup>5</sup>

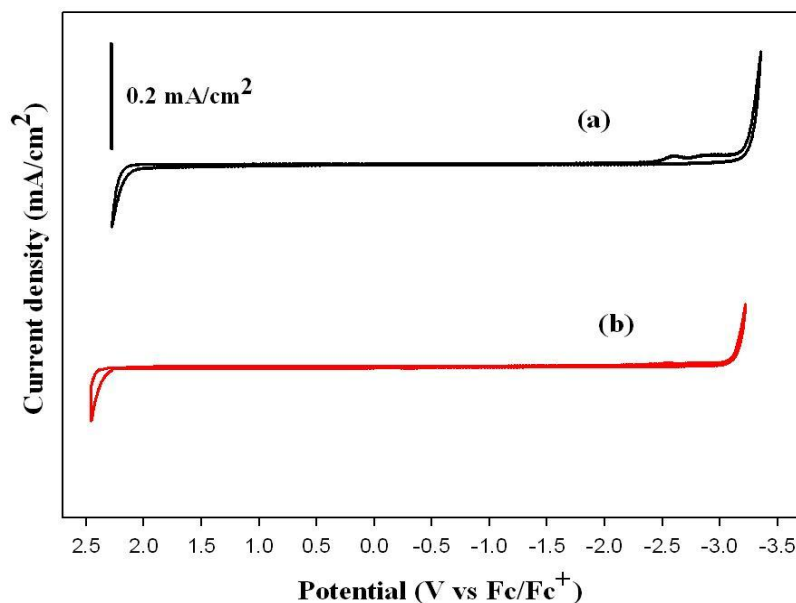

**Fig. SI3†.** The enlarged cyclic voltammograms of (a) blank urea-LiPF<sub>6</sub>, (b) blank urea-LiTFSI at a Pt electrode.

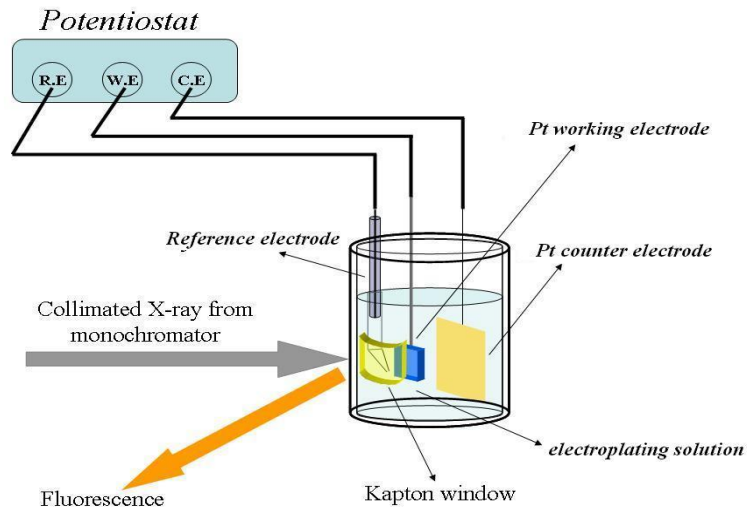

**Fig. SI4†.** Schematic illustration of the electrochemical cell used in the XAS studies. Before electrodeposition, the electroplating solutions were directly characterized with K-edge XANES spectra (without any electrode). After electrodeposition, the electrodeposited metal on substrates (without the cell) was characterized with K-edge XANES spectra.

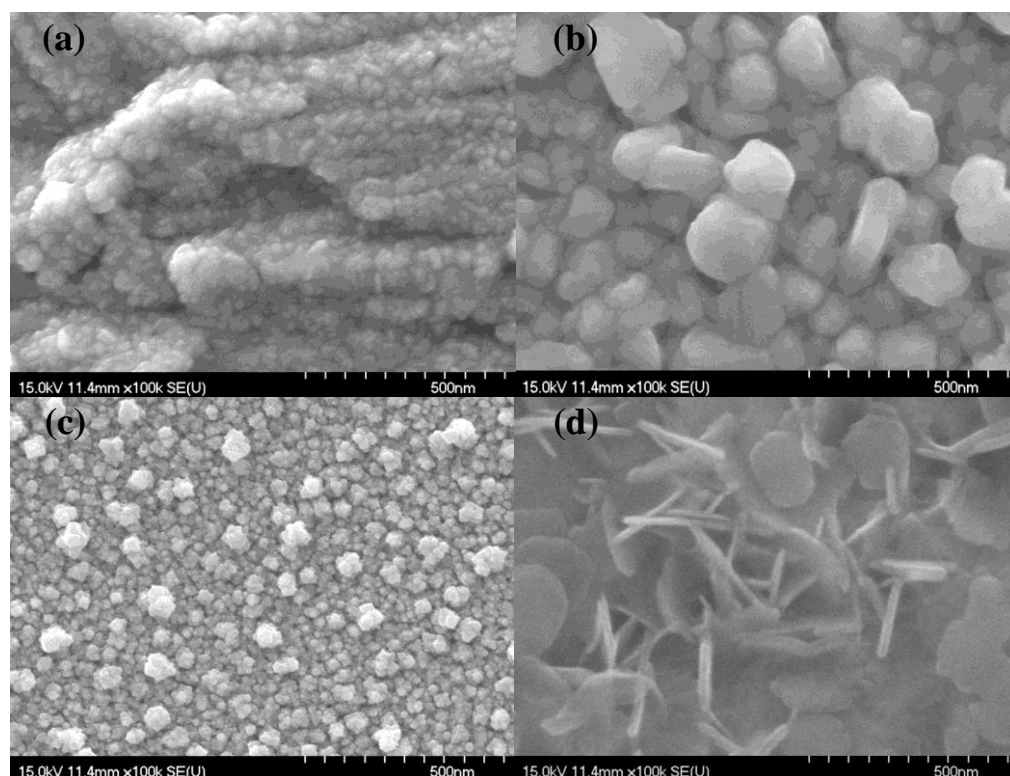

**Fig. SI5†.** SEM micrographs of the surface as deposited (a) Co,(b) Sn,(c) Ni, and (d) V, obtained from the urea-TFSI and urea-LiPF<sub>6</sub> quasi-IL, respectively.

## References

1. T. Tsuda, T. Tomioka, and C. L. Hussey, *Chem. Commun.*, 2008, 2908.
2. A. P. Abbott, G. Capper, D. L. Davies, R. K. Rasheed, and V. Tambyrajah, *Chem. Commun.*, 2003, 70.
3. R. Chen, F. Wu, H. Liang, L. Li, and B. Xu, *J. Electrochem. Soc.*, 2005, **152**, A1979.
4. H. Y. Liang, H. Li, Z. X. Wang, F. Wu, L. Q. Chen, and X. J. Huang, *J. Phys. Chem. B*, 2001, **105**, 9966.
5. R. Chen, F. Wu, L. Li, B. Xu, X. P. Qiu, and S. Chen, *J. Phys. Chem. C*, 2007, **111**, 5193.
6. M. J. Deng, P. Y. Chen, and I W. Sun, *Electrochim. Acta*, 2007, **53**, 1931.
7. M. J. Deng, P. Y. Chen, T. I. Leong, I. W. Sun, J. K. Chang, and W. T. Tsai, *Electrochem. Commun.*, 2008, **10**, 213.
8. L. Staudenmaier, *Ber. Dtsch. Chem. Ges.*, 1898, **31**, 1481.
9. Y. Ma, J. Luo, and S. L. Suib, *Chem. Mater.*, 1999, **11**, 1972.
10. C.-Y. Chen, C. Y. Fan, M. T. Lee, and J. K. Chang, *J. Mater. Chem.*, 2012, **22**, 6274.
